# Supplementary material
Source: HighWire-hosted journal article supplement (doi:10.1101/rna.063099.117)
Supplement: Supplemental_Figure_Legends.docx [file Supplemental_Figure_Legends.docx]

**Supplemental Figure 1:** Regulation of the cholesterol pathway. Under conditions of high cholesterol, INSIG binds 3-hydroxy-3-methylglutaryl-CoA reductase (HMGCR), the rate-limiting enzyme in cholesterol biosynthesis, and targets its degradation. INSIG also tethers the sterol regulatory element binding protein cleavage-activating protein (SCAP) that interacts with sterol regulatory element binding protein (SREBP) in the endoplasmic reticulum (ER). When cholesterol abundance diminishes, INSIG releases from HMGCR and SCAP and is degraded. This allows HMGCR stabilization and SCAP/SREBP translocation to the Golgi. SREBP is cleaved in the Golgi and its transcription activation domain moves to the nucleus where stimulates the synthesis of numerous genes that upregulate the cholesterol pathway.

**Supplemental Figure 2:** Organization of the Insig1 3’NCR. Shown are 3’RACE-validated cleavage and polyadenylation sites (red arrows), leading to the formation of 1.4kb, 1.9kb and 3kb Insig1 isoform RNAs. The predicted polyadenylation signal sequences (PAS) are highlighted in red. Predicted miR-122 binding sites are shown in green.

**Supplemental Figure 3**: Detection of Insig1 isoform mRNAs in liver and non-liver HeLa cells. (A) Diagram of the Insig1 3’ noncoding region, predicted polyadenylation sites and isoform mRNAs sizes. (B) Northern blot analyses of Insig1 mRNAs using distinct hybridization probe sets. Probe number 2 also detects a novel 2.4kb mRNA Insig1 isoform.

**Supplemental Figure 4:** Effects of sterols and sterol intermediates on miR-122-modulated Insig1 isoform translation. (A) Cells were transfected with YFP:Insig1 3’ NCR and 40 nM precursor hairpin miR-122 or miR-141 RNA and allowed to recover in complete media for 24hr. Cells were then depleted of sterols for 14 hours in media containing 5% lipoprotein deficient serum, lovastatin and low levels of mevalonate. At time zero, sterols and sterol intermediates were added and protein was harvested at the indicated times. Shown is the fold change in YFP protein relative to miR-141-transfected cells at each time point. The data are representative of two independent replicates. Error bars represent standard error of the mean.
