# Supplementary material
Source: HighWire-hosted journal article supplement (doi:10.1101/rna.063099.117)
Supplement: Supplemental_Table_S1.xlsx [file Supplemental_Table_S1.xlsx]

## Sheet: Sheet1
Table S1
LNA oligonucleotides:
Base preceeded by a + is an LNA base.
Antisense miR-122	+CC+ATT+G+TCA+CA+CT+C+C
Antisense miR-106b/miR-93	+TG+CA+CK+GW+CA+GC+AC+T
Antisense miR-25/92	+CG+GG+AC+AA+GT+GC+AA+T
DNA primers:
Primer type	Forward	Reverse
Insig1 3'UTR cloning primers	GTAATCTATTTAGATCGG	TCCCAAGAGGTTGTGTCA
Insig1 deletion primers
delta 205	ATTAAAACAAGTTGCCATATTTCAAAG	GATTACATCTGCAGAATTCTTAGA
Human Insig1 Northern probe primers
Overlapping stop codon	CCTGAAAAGCCCCATAGTGA	TACCTCCTTTGGGCACTGAC
Downstream probe 1	CAGTGGCGTGTTTACATGGT	TGCAAATTCCATAGGGCTGT
Downstream probe 2	AACTTTGGAATGACCCCCTTA	TGCAAAAAGAACACAATGTTGA
Other oligonucleotides
RNAse H oligo-dT	TTTTTTTTTTTTTTTTTTTTT
3'RACE RT primer	CGTGACTTCGTTCGACATGCT15V
3'RACE amplification primers	CCTGAAAAGCCCCATAGTGA	CGTGACTTCGTTCGACATGC
1.4 kb QuikChange Mutagenesis	fwd: CAAGTATTCGATTTCATTCATGTGACTCAAACAAGTTGCCATATTTCAAAGCC
	rev: GGCTTTGAAATATGGCAACTTGTTTGAGTCACATGAATGAAATCGAATACTTG
RNA oligonucleotides
pre-miR-122	5’P-UGGAGUGUGACAAUGGUGUUUGUGUCUAAACUAUCAAACGCCAUUAUCACACUAAAUA
pre-miR-141	5’P-CAUCUUCCAGUACAGUGUUGGAUGGUCUAAUUGUGAAGCUCCUAACACUGUCUGGUAAAGAUGG
pre-miR-122-dNx9	5’P-UGGAGUGUGACAAUGGUGU[dT][dT][dG][dT][dG]UCUAAACUAU[dC][dA][dA][dA]CGCCAUUAUCACACUAAAUA
